# Supplementary material for: Functional transcriptomic annotation and protein–protein interaction network analysis identify NEK2, BIRC5, and TOP2A as potential targets in obese patients with luminal A breast cancer
Source: Springer Nature journal article supplement (doi:10.1007/s10549-017-4652-3), 2018-01-12
Supplement: MOESM1 [file 15361700]

# Breast cancer patients

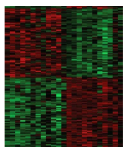

Normal-weight vs Obese (BMI < 25 vs BMI > 30)

Deregulated genes

n=177

Overexpressed genes  
n=81

Underexpressed genes  
n=96

Start KM Plotter for breast cancer

Bad prognosis  
n=39

Ensembl  
Functional  
Annotation

Start KM Plotter for breast cancer

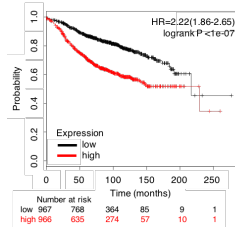

Bad prognosis-associated functions

GeneCards

Drugs search

STRING

PPI network

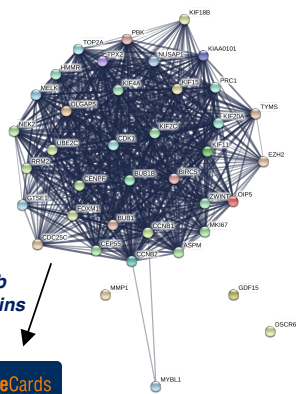

Hub proteins

Druggable PPI network

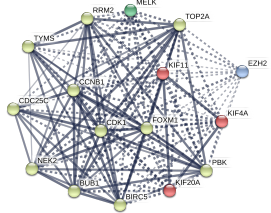

cbioportal  
for Cancer Genomics

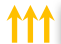

- BIRC5
- TOP2A
- NEK2
