# Supplementary material for: Functional transcriptomic annotation and protein–protein interaction network analysis identify NEK2, BIRC5, and TOP2A as potential targets in obese patients with luminal A breast cancer
Source: Springer Nature journal article supplement (doi:10.1007/s10549-017-4652-3), 2018-01-12
Supplement: MOESM4 [file 15361700]

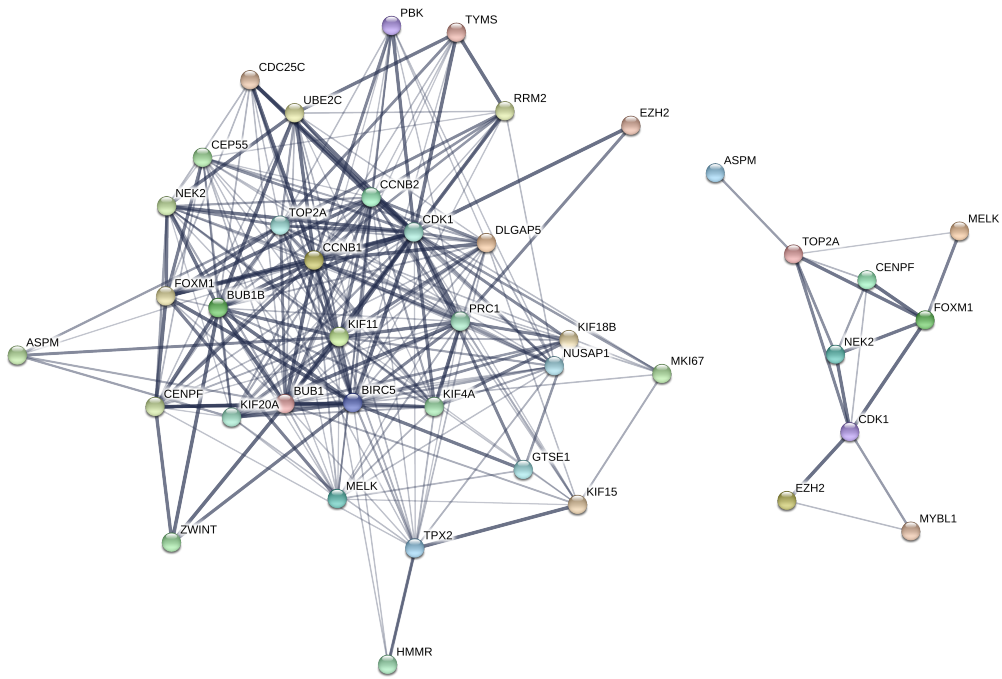

| Cell cycle             |       |
|------------------------|-------|
| Nodes                  | 33    |
| Edges                  | 238   |
| Node degree            | 14.4  |
| Clustering coefficient | 0.755 |
| PPI enrichment p-value | 0     |

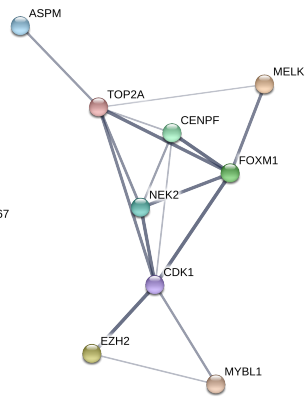

| Cell differentiation   |          |
|------------------------|----------|
| Nodes                  | 12       |
| Edges                  | 16       |
| Node degree            | 2.67     |
| Clustering coefficient | 0.886    |
| PPI enrichment p-value | 1.39e-06 |

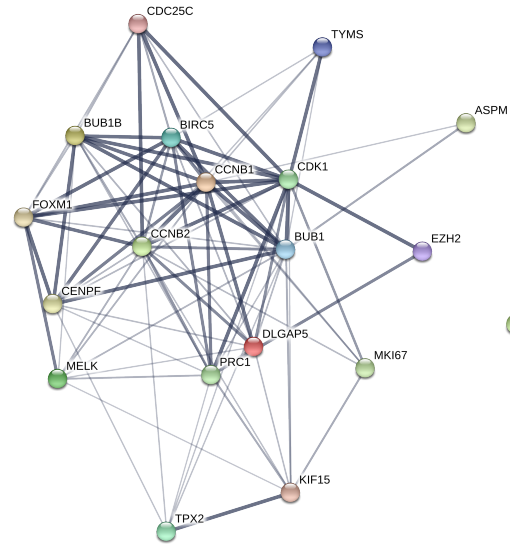

| Cell proliferation     |       |
|------------------------|-------|
| Nodes                  | 19    |
| Edges                  | 83    |
| Node degree            | 8.74  |
| Clustering coefficient | 0.809 |
| PPI enrichment p-value | 0     |

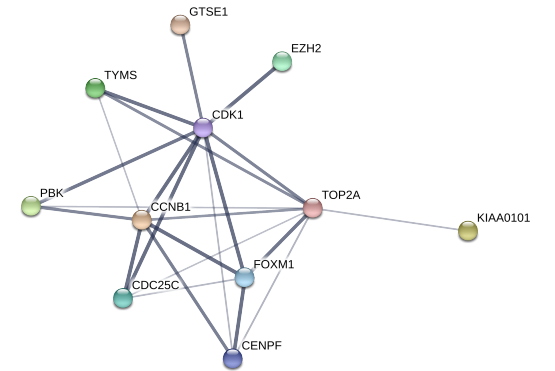

| Cellular response to extracellular stimuli |          |
|--------------------------------------------|----------|
| Nodes                                      | 12       |
| Edges                                      | 23       |
| Node degree                                | 3.83     |
| Clustering coefficient                     | 0.862    |
| PPI enrichment p-value                     | 5.93e-11 |
