# Supplementary material for: Functional transcriptomic annotation and protein–protein interaction network analysis identify NEK2, BIRC5, and TOP2A as potential targets in obese patients with luminal A breast cancer
Source: Springer Nature journal article supplement (doi:10.1007/s10549-017-4652-3), 2018-01-12
Supplement: MOESM5 [file 15361700]

## Overexpressed genes (n=81)

## Underexpressed genes (n=96)

| ID          | Gene      | FC     | p-value | ID          | Gene      | FC    | p-value |
|-------------|-----------|--------|---------|-------------|-----------|-------|---------|
| 206204_at   | GRB14     | -2.479 | 0.001   | 201525_at   | APOD      | 2.472 | 0.000   |
| 203999_at   | SYT1      | -2.228 | 0.000   | 206378_at   | SCGB2A2   | 2.376 | 0.018   |
| 205358_at   | GRIA2     | -2.214 | 0.025   | 207147_at   | DLX2      | 2.268 | 0.000   |
| 206325_at   | SERPINA6  | -2.074 | 0.006   | 209612_s_at | ADH1B     | 2.184 | 0.000   |
| 205440_s_at | NPY1R     | -2.019 | 0.002   | 218730_s_at | OGN       | 2.117 | 0.000   |
| 205696_s_at | GFRA1     | -1.934 | 0.000   | 207175_at   | ADIPOQ    | 1.897 | 0.005   |
| 221577_x_at | GDF15     | -1.801 | 0.000   | 206799_at   | SCGB1D2   | 1.879 | 0.074   |
| 213712_at   | ELOVL2    | -1.687 | 0.005   | 202037_s_at | SFRP1     | 1.856 | 0.000   |
| 204286_s_at | PMAIP1    | -1.683 | 0.000   | 209542_x_at | IGF1      | 1.782 | 0.000   |
| 213245_at   | ADCY1     | -1.640 | 0.007   | 219935_at   | ADAMTS5   | 1.766 | 0.000   |
| 202708_s_at | HIST2H2BE | -1.631 | 0.002   | 217528_at   | CLCA2     | 1.758 | 0.002   |
| 206457_s_at | DIO1      | -1.631 | 0.051   | 202965_s_at | CAPN6     | 1.751 | 0.000   |
| 204825_at   | MELK      | -1.625 | 0.000   | 209242_at   | PEG3      | 1.735 | 0.002   |
| 208305_at   | PGR       | -1.623 | 0.003   | 205529_s_at | RUNX1T1   | 1.732 | 0.000   |
| 218542_at   | CEP55     | -1.620 | 0.000   | 202992_at   | C7        | 1.700 | 0.001   |
| 203413_at   | NELL2     | -1.620 | 0.020   | 214598_at   | CLDN8     | 1.689 | 0.000   |
| 204595_s_at | STC1      | -1.611 | 0.009   | 219768_at   | VTCN1     | 1.687 | 0.050   |
| 219438_at   | NKAIN1    | -1.610 | 0.002   | 203373_at   | SOCS2     | 1.686 | 0.000   |
| 210272_at   | CYP2B7P   | -1.605 | 0.022   | 212865_s_at | COL14A1   | 1.686 | 0.000   |
| 209773_s_at | RRM2      | -1.591 | 0.000   | 204755_x_at | HLF       | 1.630 | 0.001   |
| 218755_at   | KIF20A    | -1.585 | 0.000   | 206143_at   | SLC26A3   | 1.618 | 0.036   |
| 204623_at   | TFF3      | -1.577 | 0.011   | 209351_at   | KRT14     | 1.615 | 0.028   |
| 202589_at   | TYMS      | -1.575 | 0.000   | 204363_at   | F3        | 1.614 | 0.000   |
| 201292_at   | TOP2A     | -1.572 | 0.002   | 205830_at   | CLGN      | 1.610 | 0.029   |
| 219412_at   | RAB38     | -1.550 | 0.003   | 205908_s_at | OMD       | 1.606 | 0.003   |
| 218009_s_at | PRC1      | -1.547 | 0.000   | 214087_s_at | MYBPC1    | 1.605 | 0.064   |
| 204343_at   | ABCA3     | -1.527 | 0.000   | 209291_at   | ID4       | 1.597 | 0.000   |
| 202705_at   | CCNB2     | -1.525 | 0.000   | 214321_at   | NOV       | 1.592 | 0.000   |
| 218355_at   | KIF4A     | -1.522 | 0.000   | 214451_at   | TFAP2B    | 1.589 | 0.171   |
| 219918_s_at | ASPM      | -1.520 | 0.002   | 204712_at   | WIF1      | 1.587 | 0.006   |
| 205380_at   | PDZK1     | -1.518 | 0.142   | 219140_s_at | RBP4      | 1.568 | 0.001   |
| 207267_s_at | RIPPLY3   | -1.515 | 0.002   | 33767_at    | NEFH      | 1.566 | 0.004   |
| 210559_s_at | CDK1      | -1.506 | 0.001   | 213071_at   | DPT       | 1.566 | 0.000   |
| 202095_s_at | BIRC5     | -1.505 | 0.000   | 203290_at   | HLA-DQA1  | 1.557 | 0.033   |
| 207828_s_at | CENPF     | -1.505 | 0.000   | 207057_at   | SLC16A7   | 1.543 | 0.001   |
| 221521_s_at | GINS2     | -1.499 | 0.000   | 205828_at   | MMP3      | 1.536 | 0.006   |
| 218510_x_at | FAM134B   | -1.499 | 0.000   | 204748_at   | PTGS2     | 1.536 | 0.004   |
| 204641_at   | NEK2      | -1.495 | 0.001   | 211737_x_at | PTN       | 1.536 | 0.003   |
| 210052_s_at | TPX2      | -1.484 | 0.000   | 206201_s_at | MEOX2     | 1.533 | 0.001   |
| 207144_s_at | CITED1    | -1.482 | 0.006   | 212762_s_at | TCF7L2    | 1.531 | 0.001   |
| 205167_s_at | CDC25C    | -1.479 | 0.000   | 204948_s_at | FST       | 1.525 | 0.003   |
| 207165_at   | HMMR      | -1.479 | 0.001   | 205478_at   | PPP1R1A   | 1.521 | 0.000   |
| 210523_at   | BMPR1B    | -1.478 | 0.025   | 203896_s_at | PLCB4     | 1.520 | 0.003   |
| 208016_s_at | AGTR1     | -1.477 | 0.035   | 204749_at   | NAP1L3    | 1.520 | 0.000   |
| 213599_at   | OIP5      | -1.476 | 0.000   | 204719_at   | ABCA8     | 1.515 | 0.003   |
| 205862_at   | GREB1     | -1.472 | 0.004   | 211276_at   | TCEAL2    | 1.510 | 0.003   |
| 207400_at   | NPY5R     | -1.471 | 0.008   | 209750_at   | NR1D2     | 1.506 | 0.001   |
| 204379_s_at | FGFR3     | -1.470 | 0.019   | 204679_at   | KCNK1     | 1.506 | 0.032   |
| 204916_at   | RAMP1     | -1.468 | 0.003   | 205883_at   | ZBTB16    | 1.497 | 0.005   |
| 205948_at   | PTPRT     | -1.467 | 0.028   | 204939_s_at | PLN       | 1.492 | 0.001   |
| 209408_at   | KIF2C     | -1.464 | 0.000   | 215311_at   | NTRK3     | 1.490 | 0.006   |
| 202718_at   | IGFBP2    | -1.462 | 0.006   | 212451_at   | SECISBP2L | 1.486 | 0.002   |
| 202580_x_at | FOXM1     | -1.461 | 0.000   | 206227_at   | CILP      | 1.484 | 0.002   |
| 209642_at   | BUB1      | -1.461 | 0.000   | 206091_at   | MATN3     | 1.476 | 0.010   |
| 222361_at   | TUBBP5    | -1.461 | 0.003   | 202747_s_at | ITM2A     | 1.475 | 0.002   |
| 203764_at   | DLGAP5    | -1.461 | 0.005   | 214807_at   | PLXDC2    | 1.475 | 0.002   |
| 205483_s_at | ISG15     | -1.460 | 0.007   | 215271_at   | TNN       | 1.475 | 0.004   |
| 210367_s_at | PTGES     | -1.460 | 0.002   | 209840_s_at | LRRN3     | 1.472 | 0.006   |
| 204545_at   | PEX6      | -1.459 | 0.001   | 202363_at   | SPOCK1    | 1.472 | 0.001   |
| 221667_s_at | HSPB8     | -1.458 | 0.057   | 213429_at   | BICC1     | 1.471 | 0.001   |
| 218039_at   | NUSAP1    | -1.458 | 0.000   | 203548_s_at | LPL       | 1.469 | 0.003   |
| 212022_s_at | MKI67     | -1.457 | 0.000   | 204154_at   | CDO1      | 1.468 | 0.001   |
| 205590_at   | RASGRP1   | -1.457 | 0.016   | 212382_at   | TCF4      | 1.468 | 0.004   |
| 202503_s_at | KIAA0101  | -1.449 | 0.001   | 205239_at   | AREG      | 1.464 | 0.071   |
| 214978_s_at | PPFIA4    | -1.446 | 0.006   | 212188_at   | KCTD12    | 1.463 | 0.000   |
| 204026_s_at | ZWINT     | -1.445 | 0.000   | 212670_at   | ELN       | 1.462 | 0.000   |
| 219148_at   | PBK       | -1.443 | 0.008   | 221583_s_at | KCNMA1    | 1.462 | 0.005   |
| 204475_at   | MMP1      | -1.443 | 0.081   | 202118_s_at | CPNE3     | 1.460 | 0.031   |
| 213906_at   | MYBL1     | -1.443 | 0.011   | 210002_at   | GATA6     | 1.460 | 0.002   |
| 202954_at   | UBE2C     | -1.441 | 0.000   | 220122_at   | MCTP1     | 1.459 | 0.003   |
| 209278_s_at | TFPI2     | -1.439 | 0.123   | 210072_at   | CCL19     | 1.457 | 0.031   |
| 203755_at   | BUB1B     | -1.438 | 0.000   | 219580_s_at | TMC5      | 1.457 | 0.042   |
| 203358_s_at | EZH2      | -1.437 | 0.000   | 209763_at   | CHRDL1    | 1.455 | 0.026   |
| 204318_s_at | GTSE1     | -1.436 | 0.000   | 220005_at   | P2RY13    | 1.453 | 0.000   |
| 219306_at   | KIF15     | -1.434 | 0.001   | 209335_at   | DCN       | 1.450 | 0.001   |
| 214710_s_at | CCNB1     | -1.431 | 0.000   | 201693_s_at | EGR1      | 1.450 | 0.007   |
| 209988_s_at | ASCL1     | -1.431 | 0.187   | 220504_at   | KERA      | 1.446 | 0.006   |
