# Supplementary material for: Functional transcriptomic annotation and protein–protein interaction network analysis identify NEK2, BIRC5, and TOP2A as potential targets in obese patients with luminal A breast cancer
Source: Springer Nature journal article supplement (doi:10.1007/s10549-017-4652-3), 2018-01-12
Supplement: MOESM8 [file 15361700]

| Function                               | K-M Plotter: Luminal A |         |                 |         | K-M Plotter: Luminal B |         |                 |         | K-M Plotter: HER2+ |         |                 |         | K-M Plotter: TNBC |         |                 |         |
|----------------------------------------|------------------------|---------|-----------------|---------|------------------------|---------|-----------------|---------|--------------------|---------|-----------------|---------|-------------------|---------|-----------------|---------|
|                                        | RFS                    |         | OS              |         | RFS                    |         | OS              |         | RFS                |         | OS              |         | RFS               |         | OS              |         |
|                                        | HR                     | p-value | HR              | p-value | HR                     | p-value | HR              | p-value | HR                 | p-value | HR              | p-value | HR                | p-value | HR              | p-value |
| <b>Cell cycle</b>                      | 2.22(1.86-2.65)        | 0.000   | 2.71(1.85-3.97) | 0.000   | 1.39(1.03-1.9)         | 0.033   | 1.27(0.64-2.49) | 0.49    | 0.82(0.52-1.29)    | 0.38    | 1.22(0.56-2.68) | 0.62    | 1.33(0.97-1.84)   | 0.08    | 0.5(0.25-0.97)  | 0.036   |
| <b>Cell differentiation</b>            | 1.9(1.6-2.27)          | 0.000   | 2.36(1.62-3.34) | 0.000   | 1.27(1.05-1.54)        | 0.015   | 1.31(0.9-1.9)   | 0.16    | 0.61(0.41-0.9)     | 0.011   | 0.93(0.48-1.77) | 0.82    | 1.04(0.81-1.33)   | 0.78    | 0.82(0.5-1.34)  | 0.42    |
| <b>Cell proliferation</b>              | 2.12(1.78-2.53)        | 0.000   | 2.73(1.86-4.01) | 0.000   | 1.03(0.76-1.4)         | 0.85    | 0.99(0.5-1.93)  | 0.96    | 0.87(0.55-1.38)    | 0.56    | 0.99(0.45-2.18) | 0.99    | 1.26(0.91-1.74)   | 0.16    | 0.49(0.25-0.97) | 0.035   |
| <b>Cellular response to EC stimuli</b> | 1.93(1.62-2.3)         | 0.000   | 2.34(1.61-3.4)  | 0.000   | 1.24(0.91-1.69)        | 0.16    | 1.41(0.71-2.8)  | 0.32    | 0.65(0.41-1.03)    | 0.062   | 0.98(0.44-2.14) | 0.95    | 1.18(0.86-1.63)   | 0.31    | 0.6(0.31-1.16)  | 0.13    |
