# Supplementary material for: Functional transcriptomic annotation and protein–protein interaction network analysis identify NEK2, BIRC5, and TOP2A as potential targets in obese patients with luminal A breast cancer
Source: Springer Nature journal article supplement (doi:10.1007/s10549-017-4652-3), 2018-01-12
Supplement: MOESM9 [file 15361700]

| Cell cycle  |              | Cell differentiation |              | Cell proliferation |              | Cellular response to extracellular stimuli |              |
|-------------|--------------|----------------------|--------------|--------------------|--------------|--------------------------------------------|--------------|
| <i>Node</i> | <i>Edges</i> | <i>Node</i>          | <i>Edges</i> | <i>Node</i>        | <i>Edges</i> | <i>Node</i>                                | <i>Edges</i> |
| BUB1        | 27           | CDK1                 | 6            | BUB1               | 15           | CDK1                                       | 9            |
| CDK         | 27           | TOP2A                | 6            | CCNB2              | 15           | TOP2A                                      | 8            |
| CCNB1       | 25           | FOXM1                | 5            | CDK1               | 15           | CCNB1                                      | 7            |
| CCNB2       | 25           | CENPF                | 4            | CCNB1              | 14           | FOXM1                                      | 5            |
| BIRC5       | 24           | NEK2                 | 4            | BIRC5              | 12           | CDC25C                                     | 4            |
| KIF11       | 23           |                      |              | PRC1               | 12           | CENPF                                      | 4            |
| TOP2A       | 23           |                      |              | BUB1B              | 11           |                                            |              |
| PRC1        | 21           |                      |              | CENPF              | 10           |                                            |              |
| BUB1        | 19           |                      |              | DLGAP5             | 10           |                                            |              |
| DLGAP5      | 19           |                      |              | FOXM1              | 9            |                                            |              |
| KIF4A       | 19           |                      |              |                    |              |                                            |              |
| CENPF       | 18           |                      |              |                    |              |                                            |              |
| KIF20A      | 18           |                      |              |                    |              |                                            |              |
| NEK2        | 17           |                      |              |                    |              |                                            |              |
| CEP55       | 16           |                      |              |                    |              |                                            |              |
| MELK        | 16           |                      |              |                    |              |                                            |              |
| NUSAP       | 16           |                      |              |                    |              |                                            |              |
| UBE2C       | 15           |                      |              |                    |              |                                            |              |
