# Supplementary material for: Functional transcriptomic annotation and protein–protein interaction network analysis identify NEK2, BIRC5, and TOP2A as potential targets in obese patients with luminal A breast cancer
Source: Springer Nature journal article supplement (doi:10.1007/s10549-017-4652-3), 2018-01-12
Supplement: MOESM10 [file 15361700]

| Gene                   | Source                                                         | DRUG                            | Mechanism of Action                                                                             |
|------------------------|----------------------------------------------------------------|---------------------------------|-------------------------------------------------------------------------------------------------|
| <b>BIRC5</b>           | DrugBank, ApexBio, DGldb, and Novoseek                         | Docetaxel                       | Microtubulin disassembly inhibitor, Tubulin and VEGF inhibitor, Taxanes, Microtubule stabilizer |
|                        |                                                                | Paclitaxel                      | Tubulin and Bcl2 inhibitor, Taxanes                                                             |
|                        |                                                                | <b>LY2181308</b>                | Survivin inhibitors                                                                             |
|                        |                                                                | <b>YM155</b>                    | Survivin suppressant, apoptosis inhibitor, Survivin inhibitors                                  |
|                        |                                                                | <b>YM-155 hydrochloride</b>     | Potent survivin inhibitor                                                                       |
|                        |                                                                | AEQ40826 (HGS10299)             | IAP (Inhibitor of Apoptosis Protein) family inhibitor                                           |
|                        |                                                                | <b>SPC-3042</b>                 | Survivin inhibitor                                                                              |
| <b>BUB1</b>            | Novoseek and HMDB                                              | Adenosine triphosphate          |                                                                                                 |
|                        |                                                                | Adenosine diphosphate           | Full agonist, Agonist                                                                           |
| <b>CCNB1</b>           | ApexBio and Novoseek                                           | Temozolamide                    | Alkylating Agents                                                                               |
|                        |                                                                | Nocodazole                      | Tubulin production inhibitor, anti-neoplastic agent                                             |
|                        |                                                                | Purvalanol A,                   |                                                                                                 |
|                        |                                                                | (R)-DRF053 dihydrochloride      | cdk/CK1 inhibitor, potent and ATP-competitive                                                   |
|                        |                                                                | Aminopurvalanol A               |                                                                                                 |
|                        |                                                                | Bendamustine HCl                | Cytostatic agent for non-Hodgkin lymphomas                                                      |
|                        |                                                                | NSC 693868                      |                                                                                                 |
| <b>CDK1</b>            | DrugBank, PharmGKB, ApexBio, DGldb, HMDB, Tocris, and Novoseek | Deferasirox                     | Oral iron chelator                                                                              |
|                        |                                                                | Alsterpaullone                  | Target, inhibitor                                                                               |
|                        |                                                                | Flavopiridol                    | Pan-cdk inhibitor                                                                               |
|                        |                                                                | Olomoucine                      | Target, binder                                                                                  |
|                        |                                                                | SU9516                          | Target, binder                                                                                  |
|                        |                                                                | Nocodazole                      | Tubulin production inhibitor, anti-neoplastic agent                                             |
|                        |                                                                | Hymenialdisine                  | Target                                                                                          |
|                        |                                                                | Indirubin-3'-Monoxime           | Target, binder                                                                                  |
|                        |                                                                | AT7519                          | Multi-CDK inhibitor                                                                             |
|                        |                                                                | Aminopurvalanol A               |                                                                                                 |
|                        |                                                                | <b>BMS265246</b>                | CDK1/2 inhibitor, potent and selective, Potent cdk1/2 inhibitor                                 |
|                        |                                                                | Kenpaullone                     | Potent cyclin-dependent kinase inhibitor. Also inhibits GSK-3                                   |
|                        |                                                                | <b>Ro 3306</b>                  | An ATP-competitive, potent CDK1 inhibitor, Cyclin-dependent kinase (cdk) 1 inhibitor            |
|                        |                                                                | SCH727965                       | CDK inhibitor, CDK2 Inhibitors, Kinase Inhibitors                                               |
|                        |                                                                | radiotherapy                    |                                                                                                 |
|                        |                                                                | <b>I-DRF053 dihydrochloride</b> | cdk/CK1 inhibitor, potent and ATP-competitive                                                   |
|                        |                                                                | AT7519 Hydrochloride            | Multi-CDK inhibitor                                                                             |
|                        |                                                                | AT7519 trifluoroacetate         | CDK/cyclin inhibitor                                                                            |
|                        |                                                                | <b>AZD-5438</b>                 | Potent CDK1/2/9 inhibitor                                                                       |
|                        |                                                                | AZD-5597                        | Potent CDK inhibitor                                                                            |
|                        |                                                                | BS-181 HCl                      | CDK7 inhibitor, highly selective                                                                |
|                        |                                                                | CDK inhibitor II                |                                                                                                 |
|                        |                                                                | CGP60474                        | CDKs and PKC inhibitor, potent                                                                  |
| Dinaciclib (SCH727965) | Potent CDK inhibitor                                           |                                 |                                                                                                 |

|              |                                                |                             |                                                                                               |
|--------------|------------------------------------------------|-----------------------------|-----------------------------------------------------------------------------------------------|
|              |                                                | Flavopiridol hydrochloride  |                                                                                               |
|              |                                                | LDC000067                   |                                                                                               |
|              |                                                | NSC 693868                  |                                                                                               |
|              |                                                | Nu 6027                     | ATR/CDK inhibitor, potent and selective                                                       |
|              |                                                | <b>NVP-LCQ195</b>           | CDK1/CDK2/CDK5 inhibitor                                                                      |
|              |                                                | <b>P276-00</b>              | CDK-1/CDK4/CDK9 inhibitor                                                                     |
|              |                                                | PF 4800567 hydrochloride    | Selective casein kinase 1eta inhibitor                                                        |
|              |                                                | PHA-793887                  | Pan-Cdk inhibitor                                                                             |
|              |                                                | PHA-848125                  | CDK inhibitor, potent and ATP-competitive                                                     |
|              |                                                | <b>Purvalanol B</b>         | CDK1/CDK2/CDK4 inhibitor                                                                      |
|              |                                                | <b>R547</b>                 | CDK1/2/4 inhibitor,ATP-competitive                                                            |
|              |                                                | TMCB                        | Dual-kinase inhibitor; inhibits CK2 and ERK8                                                  |
|              |                                                | ALOISINE A                  |                                                                                               |
|              |                                                | ALSTERPAULLONE 2-CYANOETHYL |                                                                                               |
|              |                                                | alvocidib                   | Kinase Inhibitors                                                                             |
|              |                                                | AURORA KINASE/CDK INHIBITOR |                                                                                               |
|              |                                                | BAY 1000394                 | pan-CDK inhibitor                                                                             |
|              |                                                | BOHEMINE                    |                                                                                               |
|              |                                                | CDK1 INHIBITOR (CGP74514A)  |                                                                                               |
|              |                                                | CDK1/2 INHIBITOR III        |                                                                                               |
|              |                                                | CDK1/5 INHIBITOR            |                                                                                               |
|              |                                                | CDK2 INHIBITOR III          |                                                                                               |
|              |                                                | CDK2 INHIBITOR IV           |                                                                                               |
|              |                                                | CDK4 inhibitor              | CDK4/Cyclin D1 inhibitor                                                                      |
|              |                                                | COMPOUND 52 [PMID:9677190]  |                                                                                               |
|              |                                                | GSK-3 INHIBITOR IX          |                                                                                               |
|              |                                                | RGB-286638                  | CDKs inhibitor                                                                                |
|              |                                                | RONICICLIB                  |                                                                                               |
|              |                                                | Senexin A                   | CDK8 inhibitor, Cyclin-dependent kinase 8 (cdk8) inhibitor                                    |
| <b>FOXM1</b> | ApexBio, Tocris, and Novoseek                  | Verteporfin                 | YAP inhibitor; disrupts YAP-TEAD interactions                                                 |
|              |                                                | <b>Thiostrepton</b>         | FOXM1 inhibitor                                                                               |
|              |                                                | BI 6015                     | HNF4α antagonist, Hepatocyte nuclear factor 4alpha (HNF4alpha) antagonist                     |
|              |                                                | GANT61                      | GLI antagonist, GLI antagonist; inhibits Hedgehog (Hh) signaling                              |
| <b>KIF11</b> | DrugBank, ApexBio, DGIdb, Tocris, and Novoseek | Monastrol                   | Selective inhibitor of mitotic kinesin Eg5                                                    |
|              |                                                | <b>GSK-923295</b>           | CENP-E inhibitor,small-molecule, Kinesin protein inhibitors                                   |
|              |                                                | <b>Ispinesib(SB-715992)</b> | Kinesin spindle protein (KSP) inhibitor, High affinity and selective allosteric KSP inhibitor |
|              |                                                | MPI-0479605                 | Mps1 inhibitor,selective and ATP competitive                                                  |
|              |                                                | <b>SB743921</b>             | Potent KSP inhibitor                                                                          |
|              |                                                | 4SC-205                     | inhibitor                                                                                     |
|              |                                                | ALN-VSP                     |                                                                                               |
|              |                                                | <b>ARQ-621</b>              | Kinesin protein inhibitors                                                                    |
|              |                                                | <b>ARRY-520</b>             | Kinesin protein inhibitors                                                                    |
|              |                                                | <b>AZD4877</b>              | Kinesin protein inhibitors                                                                    |

|               |                                                                                          |                                 |                                                                           |
|---------------|------------------------------------------------------------------------------------------|---------------------------------|---------------------------------------------------------------------------|
|               |                                                                                          | <b>LY-2523355</b>               | Kinesin protein inhibitors                                                |
|               |                                                                                          | <b>MK0731</b>                   | Kinesin protein inhibitors                                                |
|               |                                                                                          | <b>SB-743921</b>                | Kinesin protein inhibitors                                                |
|               |                                                                                          | Paprotrain                      | Reversible inhibitor of MKLP-2                                            |
| <b>KIF20A</b> | ClinicalTrials and HMDB                                                                  | chenodeoxycholic acid           | Antagonist                                                                |
|               |                                                                                          | Guanosine triphosphate          |                                                                           |
|               |                                                                                          | Cathartics                      |                                                                           |
|               |                                                                                          | Gastrointestinal Agents         |                                                                           |
|               |                                                                                          | Laxatives                       |                                                                           |
|               |                                                                                          | Vaccines                        |                                                                           |
| <b>KIF4A</b>  | ApexBio                                                                                  | <b>Ispinesib (SB-715992)</b>    | Kinesin spindle protein (KSP) inhibitor                                   |
|               |                                                                                          | <b>SB743921</b>                 | Potent KSP inhibitor                                                      |
| <b>MELK</b>   | ApexBio                                                                                  | Adenosine triphosphate          | Full agonist, Agonist                                                     |
|               |                                                                                          | <b>OTSSP167</b>                 | MELK inhibitor                                                            |
|               |                                                                                          | <b>OTSSP167 hydrochloride</b>   | MELK inhibitor, highly potent and selective                               |
| <b>PBK</b>    | ApexBio, DGldb, and HMDB                                                                 | Adenosine triphosphate          |                                                                           |
|               |                                                                                          | OTS964                          | TOPK inhibitor, potent and selective                                      |
|               |                                                                                          | OTS514                          | TOPK inhibitor, highly potent                                             |
| <b>RRM2</b>   | DrugBank, PharmGKB, ApexBio, DGldb, HMDB, and Novoseek                                   | Cladribine                      | Apoptosis inducer in CLL cells                                            |
|               |                                                                                          | <b>Gemcitabine</b>              | Ribonucleotide reductase and DNA synthesis inhibitor, Nucleoside Analogs  |
|               |                                                                                          | Hydroxyurea                     |                                                                           |
|               |                                                                                          | Gallium nitrate                 |                                                                           |
|               |                                                                                          | <b>Clofarabine</b>              | Antimetabolite, inhibit DNA polymerase and ribonucleotide reductase       |
|               |                                                                                          | Cytarabine                      |                                                                           |
|               |                                                                                          | Fludarabine                     | DNA synthesis inhibitor                                                   |
|               |                                                                                          | Adenosine triphosphate          |                                                                           |
|               |                                                                                          | CDP                             |                                                                           |
|               |                                                                                          | Guanosine diphosphate           |                                                                           |
|               |                                                                                          | Trypanothione                   |                                                                           |
|               |                                                                                          | Uridine-5'-Diphosphate          |                                                                           |
|               |                                                                                          | motexafin gadolinium            |                                                                           |
|               |                                                                                          | GTI 2040                        |                                                                           |
|               |                                                                                          | Imexon                          |                                                                           |
|               |                                                                                          | <b>Triapine</b>                 | Ribonucleotide reductase inhibitor, Others                                |
|               |                                                                                          | Fludarabine Phosphate (Fludara) | Inhibits STAT1 activation and DNA synthesis                               |
| LOR-2040      |                                                                                          |                                 |                                                                           |
| <b>TOP2A</b>  | DrugBank, ClinicalTrials, ApexBio, DGldb, FDA Approved Drugs, HMDB, Tocris, and Novoseek | <b>Etoposide</b>                | Topo II inhibitor, Topoisomerase 2 Inhibitors, Topoisomerase II inhibitor |
|               |                                                                                          | <b>Doxorubicin</b>              | Topo II inhibitor, 3mmunosuppressive antineoplastic antibiotic            |
|               |                                                                                          | <b>Teniposide</b>               | inhibitor, Target                                                         |
|               |                                                                                          | <b>Daunorubicin</b>             | DNA topoisomerase II inhibitor                                            |
|               |                                                                                          | <b>Epirubicin</b>               | inhibitor, Target                                                         |
|               |                                                                                          | <b>Amsacrine</b>                | Topoisomerase 2 inhibitor                                                 |
|               |                                                                                          | Mitoxantrone                    | inhibitor, Target                                                         |
|               |                                                                                          | Ciprofloxacin                   | Target, inhibitor                                                         |
|               |                                                                                          | Ofloxacin                       | Fluoroquinolones, antibiotics                                             |
|               |                                                                                          | Idarubicin                      | inhibitor, Target                                                         |
|               |                                                                                          | Podofilox                       | Target, inhibitor                                                         |
|               |                                                                                          | Valrubicin                      | inhibitor, Target                                                         |
|               |                                                                                          | <b>Doxil</b>                    | DNA intercalator and TOPO II inhibitor, Topoisomerase 2 Inhibitors        |

|  |                    |                                                                                                                          |
|--|--------------------|--------------------------------------------------------------------------------------------------------------------------|
|  | Dexrazoxane        | Target, inhibitor                                                                                                        |
|  | Enoxacin           | Target, inhibitor                                                                                                        |
|  | Levofloxacin       | Target, inhibitor                                                                                                        |
|  | Lomefloxacin       | Target, inhibitor                                                                                                        |
|  | Lucanthone         | Target, inhibitor                                                                                                        |
|  | Moxifloxacin       | Target, inhibitor                                                                                                        |
|  | Norfloxacin        | Target, inhibitor                                                                                                        |
|  | Pefloxacin         | Target, inhibitor                                                                                                        |
|  | Sparfloxacin       | Target, inhibitor                                                                                                        |
|  | Trovafloxacin      | Target, inhibitor                                                                                                        |
|  | <b>Amrubicin</b>   | Topoisomerase II inhibitor, anthracycline agent                                                                          |
|  | Cyclophosphamide   | Nitrogen mustard alkylating agent and prodrug.                                                                           |
|  | Docetaxel          | Microtubulin disassembly inhibitor, Tubulin and VEGF inhibitor, Taxanes, Microtubule stabilizer                          |
|  | Paclitaxel         | Tubulin and Bcl2 inhibitor, Taxanes                                                                                      |
|  | Topotecan          | Topoisomerase 1 inhibitor, TOPO I inhibitor, Topoisomerase 1 Inhibitors                                                  |
|  | Trastuzumab        | HER2 antagonist, HER2 Inhibitors, Therapeutic Antibodies, Epidermal growth factor receptor (EGFR) inhibitors             |
|  | Dactinomycin       | Target                                                                                                                   |
|  | Finafloxacin       | Target, inhibitor                                                                                                        |
|  | Fleroxacin         | Target, inhibitor                                                                                                        |
|  | Carboplatin        | Antitumor agent that forms platinum-DNA adducts., Platinum                                                               |
|  | Fluorouracil       | RNA processing inhibitor and thymidylate synthase inhibitor                                                              |
|  | Pertuzumab         | HER2 Inhibitors, Therapeutic Antibodies, Epidermal growth factor receptor (EGFR) inhibitors, HER2 Dimerization Inhibitor |
|  | Gatifloxacin       | Fluoroquinolone antibiotic, inhibits bacterial TOPO II                                                                   |
|  | Irinotecan         | Topoisomerase I inhibitor, TOPO I inhibitor, Topoisomerase 1 Inhibitors                                                  |
|  | Avelox I.V.        |                                                                                                                          |
|  | Ellence            |                                                                                                                          |
|  | Valstar            |                                                                                                                          |
|  | Camptothecin       | Topoisomerase I inhibitor, prototypic                                                                                    |
|  | <b>Amonafide</b>   | DNA intercalator, Topo II inhibitor                                                                                      |
|  | Genistein          | AR agonist                                                                                                               |
|  | RTA 744            | Target                                                                                                                   |
|  | Banoxantrone       | Target                                                                                                                   |
|  | Elsamitrucin       | Target                                                                                                                   |
|  | SP1049C            | Target                                                                                                                   |
|  | ZEN-012            | Target                                                                                                                   |
|  | <b>Pirarubicin</b> | Topo II inhibitor; antineoplastic; analogue of doxorubicin                                                               |
|  | DTS-201            |                                                                                                                          |
|  | Flumequine         |                                                                                                                          |
|  | INNO-206           | Prodrug of doxorubicin                                                                                                   |
|  | <b>Voreloxin</b>   | Topo II inhibitor                                                                                                        |
|  | <b>ellipticine</b> | DNA topoisomerase II inhibitor                                                                                           |
|  | Antimitotic Agents |                                                                                                                          |

|             |                                                                                    |                                            |                                                                                              |
|-------------|------------------------------------------------------------------------------------|--------------------------------------------|----------------------------------------------------------------------------------------------|
|             |                                                                                    | (S)-10-Hydroxycamptothecin                 |                                                                                              |
|             |                                                                                    | <b>Amsacrine hydrochloride</b>             | Topoisomerase 2 inhibitor                                                                    |
|             |                                                                                    | Beta-Lapachone                             | DNA topoisomerase I inhibitor, selective                                                     |
|             |                                                                                    | <b>Dexrazoxane HCl (ICRF-187, ADR-529)</b> | Topoisomerase II inhibitor, intracellular ion chelator, cardioprotective agent               |
|             |                                                                                    | <b>Doxorubicin (Adriamycin) HCl</b>        | Antitumour antibiotic, inhibits TOPO II.                                                     |
|             |                                                                                    | Epirubicin HCl                             | Antibiotic antitumor agent                                                                   |
|             |                                                                                    | Idarubicin HCl                             | Anthracycline and daunorubicin analog, topoisomerase inhibitor                               |
|             |                                                                                    | Mitoxantrone HCl                           | Topoisomerase II inhibitor, anti-neoplastic drug                                             |
|             |                                                                                    | Moxifloxacin HCl                           | Fluoroquinolone antibiotic                                                                   |
|             |                                                                                    | Novobiocin Sodium                          |                                                                                              |
|             |                                                                                    | Podophyllotoxin                            |                                                                                              |
|             |                                                                                    | Voreloxin Hydrochloride                    | Antineoplastic naphthyridine analogue                                                        |
|             |                                                                                    | AEZS-112, ZEN-012                          |                                                                                              |
|             |                                                                                    | BECATECARIN                                |                                                                                              |
|             |                                                                                    | C-1311                                     |                                                                                              |
|             |                                                                                    | CAP7.1                                     |                                                                                              |
|             |                                                                                    | CNDO101                                    |                                                                                              |
|             |                                                                                    | GPX-100                                    |                                                                                              |
|             |                                                                                    | Idronoxil                                  | Caspase activator, XIAP inhibitor, FLIP suppressor, and TOPO II inhibitor                    |
|             |                                                                                    | topotecan hydrochloride                    | DNA topoisomerase I inhibitor; Camptothecin (Cat. No. 1100) analog                           |
| <b>NEK2</b> | DrugBank, ApexBio, HMDB, and Novoseek                                              | Adenosine triphosphate                     |                                                                                              |
|             |                                                                                    | INH6                                       |                                                                                              |
|             |                                                                                    | Magnesium                                  |                                                                                              |
| <b>TYMS</b> | DrugBank, PharmGKB, ApexBio, DGldb, FDA Approved Drugs, HMDB, Tocris, and Novoseek | <b>Pemetrexed</b>                          | TS, DHFR, GARFT and AICARFT inhibitor, DHFR and Thymidylate synthase inhibitor, Anti-Folates |
|             |                                                                                    | Raltitrexed                                | inhibitor, Target                                                                            |
|             |                                                                                    | <b>Capecitabine</b>                        | RNA processing inhibitor and thymidylate synthase inhibitor, F-pyrimidines                   |
|             |                                                                                    | <b>Fluorouracil</b>                        | RNA processing inhibitor and thymidylate synthase inhibitor                                  |
|             |                                                                                    | Methotrexate                               | Folate antagonist, inhibits DFHR                                                             |
|             |                                                                                    | Floxuridine                                | Antineoplastic antimetabolite, RNA and DNA synthesis inhibitor                               |
|             |                                                                                    | Tegafur                                    |                                                                                              |
|             |                                                                                    | Gemcitabine                                | Ribonucleotide reductase and DNA synthesis inhibitor, Nucleoside Analogs                     |
|             |                                                                                    | leucovorin                                 |                                                                                              |
|             |                                                                                    | Trifluridine                               | Target, inhibitor                                                                            |
|             |                                                                                    | Trimethoprim                               | Target, inhibitor                                                                            |
|             |                                                                                    | Irinotecan                                 | Topoisomerase I inhibitor, TOPO I inhibitor, Topoisomerase 1 Inhibitors                      |
|             |                                                                                    | Pralatrexate                               | Antifolate, a folate analog, RFC-1 targeted DHFR inhibitor                                   |
|             |                                                                                    | Alimta                                     |                                                                                              |
|             |                                                                                    | Folotyn                                    |                                                                                              |
|             |                                                                                    | Gemzar                                     |                                                                                              |
|             |                                                                                    | Xeloda                                     |                                                                                              |
|             |                                                                                    | Dihydrofolic acid                          |                                                                                              |
|             |                                                                                    | OSI-7904L                                  | Target                                                                                       |

|               |                                     |                                                  |                                                                   |
|---------------|-------------------------------------|--------------------------------------------------|-------------------------------------------------------------------|
|               |                                     | ANX-510                                          | Target                                                            |
|               |                                     | NB1011                                           | Target                                                            |
|               |                                     | Triacsin C                                       | Inhibitor of acyl-CoA synthetase                                  |
|               |                                     | Pyrimidine analogues                             |                                                                   |
|               |                                     | Doxifluridine                                    |                                                                   |
|               |                                     | Leucovorin Calcium                               | Derivative of folic acid                                          |
|               |                                     | N1,N12-Diethylspermine tetrahydrochloride        |                                                                   |
|               |                                     | <b>Nolatrexed (AG-337)</b>                       | Non-classical thymidylate synthase inhibitor                      |
|               |                                     | Pemetrexed disodium hemipenta hydrate            |                                                                   |
|               |                                     | Risedronate Sodium                               | FPP synthase inhibitor                                            |
|               |                                     | Triflurdine (Viroptic)                           | Anti-herpesvirus antiviral drug                                   |
|               |                                     | MODUFOLIN                                        |                                                                   |
|               |                                     | NB-1011                                          |                                                                   |
|               |                                     | ONX 0801                                         |                                                                   |
|               |                                     | AT 56                                            | L-PGDS inhibitor                                                  |
|               |                                     | Borrelidin                                       | Antiangiogenic; inhibits threonyl-tRNA synthetase                 |
|               |                                     | HQL 79                                           | Human hematopoietic prostaglandin D synthase (H-PGDS) inhibitor   |
|               |                                     | PD 404182                                        | High affinity inhibitor of KDO 8-P synthase; also DDAH1 inhibitor |
| <b>CDC25C</b> | ApexBio, HMDB, Tocris, and Novoseek | Temozolomide                                     | Alkylating Agents                                                 |
|               |                                     | Phosphoric acid                                  |                                                                   |
|               |                                     | <b>NSC 95397</b>                                 | Selective Cdc25 dual specificity phosphatase inhibitor            |
|               |                                     | NSC 663284                                       |                                                                   |
| <b>EZH2</b>   | ApexBio, DGI db, HMDB, and Novoseek | L-Lysine                                         | Agonist                                                           |
|               |                                     | S-Adenosylmethionine                             |                                                                   |
|               |                                     | s-adenosylhomocysteine                           |                                                                   |
|               |                                     | <b>EI1</b>                                       | EZH2 inhibitor                                                    |
|               |                                     | <b>EPZ-6438</b>                                  | EZH2 inhibitor, potent and selective                              |
|               |                                     | <b>GSK126</b>                                    | EZH2 inhibitor                                                    |
|               |                                     | <b>3-Deazaneplanocin A (DZNep) hydrochloride</b> | Cell permeable SAHH and ENZ2 inhibitor                            |
|               |                                     | <b>CPI-169</b>                                   | EZH2 inhibitor                                                    |
|               |                                     | <b>EPZ005687</b>                                 | EZH2 inhibitor, potent and selective                              |
|               |                                     | <b>GSK343</b>                                    | EZH2 inhibitor, potent, selective and cell permeable              |
|               |                                     | <b>GSK503</b>                                    | EZH2 inhibitor                                                    |
|               |                                     | <b>UNC1999</b>                                   | EZH2 inhibitor                                                    |
